# Supplementary material for: Surface micro- and nano-texturing of stainless steel by femtosecond laser for the control of cell migration
Source: PubMed Central journal article supplement (PMC5090360; doi:10.1038/srep36296), 2016-11-02
Supplement: srep36296-s1.pdf [file srep36296-s1.pdf]

## Supplementary information

### Surface micro- and nano-texturing of stainless steel by femtosecond laser for the control of cell migration

M. Martínez-Calderon<sup>a</sup>, Miguel Manso-Silván<sup>b</sup>, A. Rodríguez<sup>a</sup>, M. Gómez-Aranzadi<sup>a</sup>, J.P. García-Ruiz<sup>c</sup>, S.M. Olaizola<sup>a</sup>, and R.J Martín-Palma<sup>b</sup>

<sup>a</sup> CEIT-IK4 & Tecnun (University of Navarra), Paseo Manuel Lardizábal 15, 20018 San Sebastián, Spain

<sup>b</sup> Departamento de Física Aplicada, Universidad Autónoma de Madrid, Campus de Cantoblanco, 28049 Madrid, Spain

<sup>c</sup> Departamento de Biología Molecular, Universidad Autónoma de Madrid, Campus de Cantoblanco, 28049 Madrid, Spain

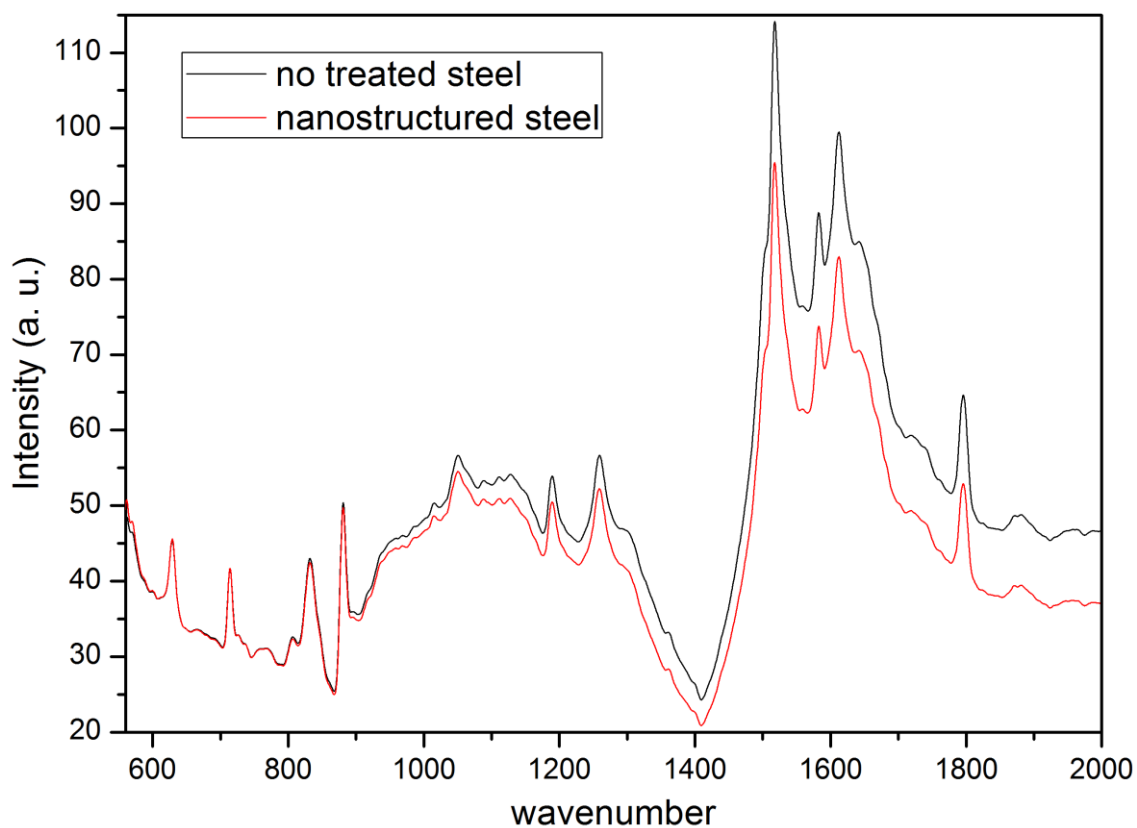

**Figure S1.** FTIR Spectra corresponding to the no treated areas (black line) and to the nanostructured areas with LIPSS (red line).

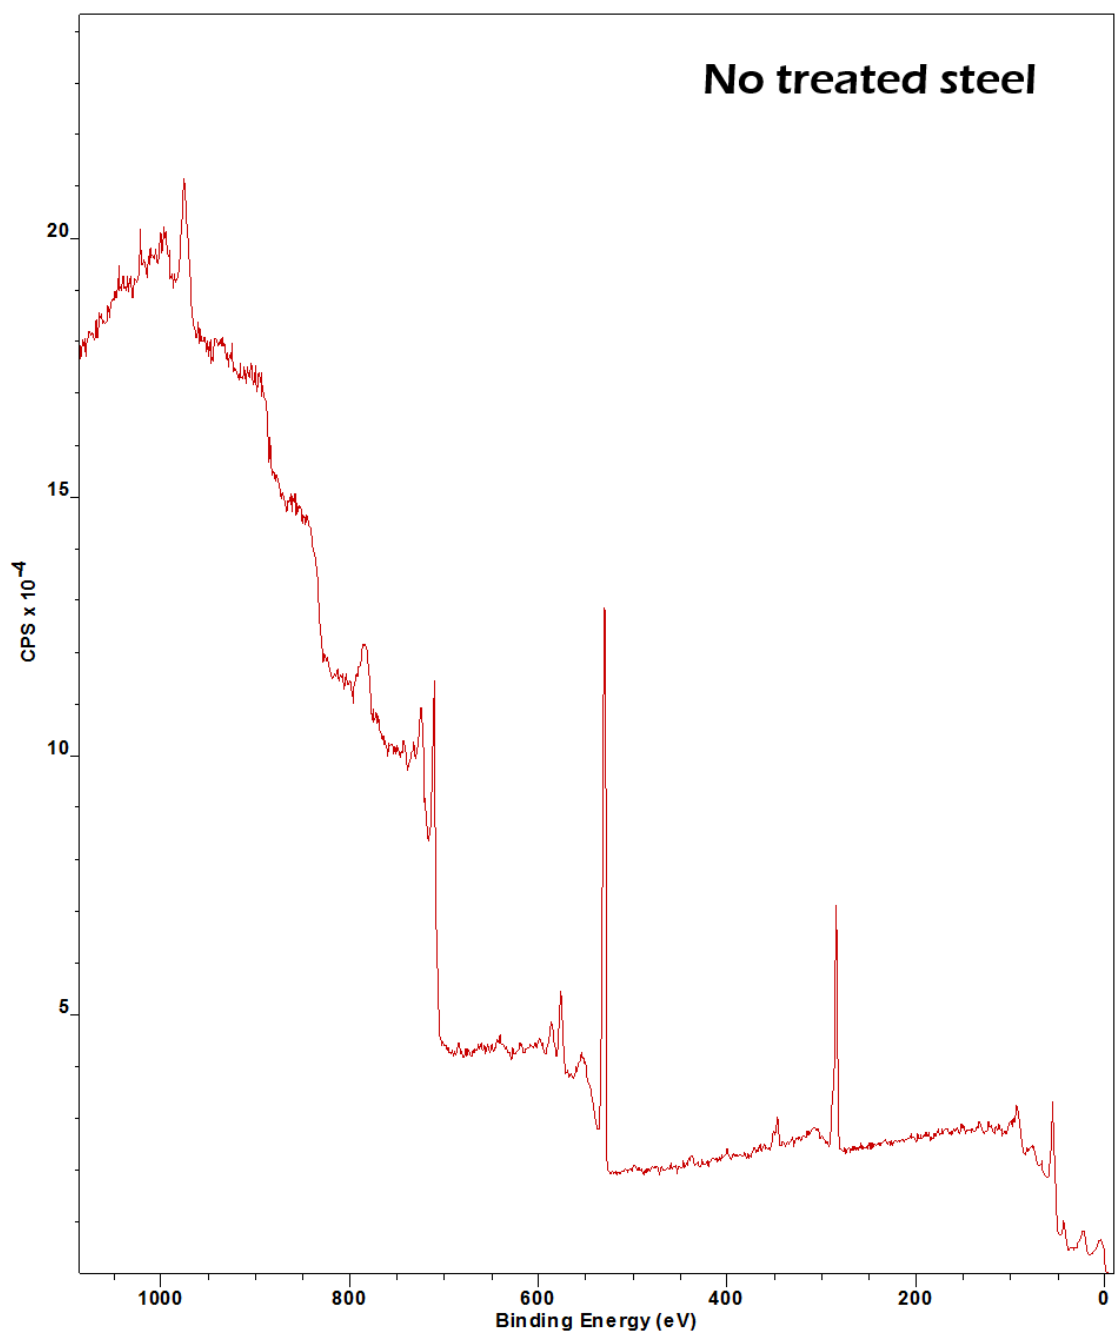

**Figure S2.** XPS Spectra corresponding to the no treated areas of the steel.

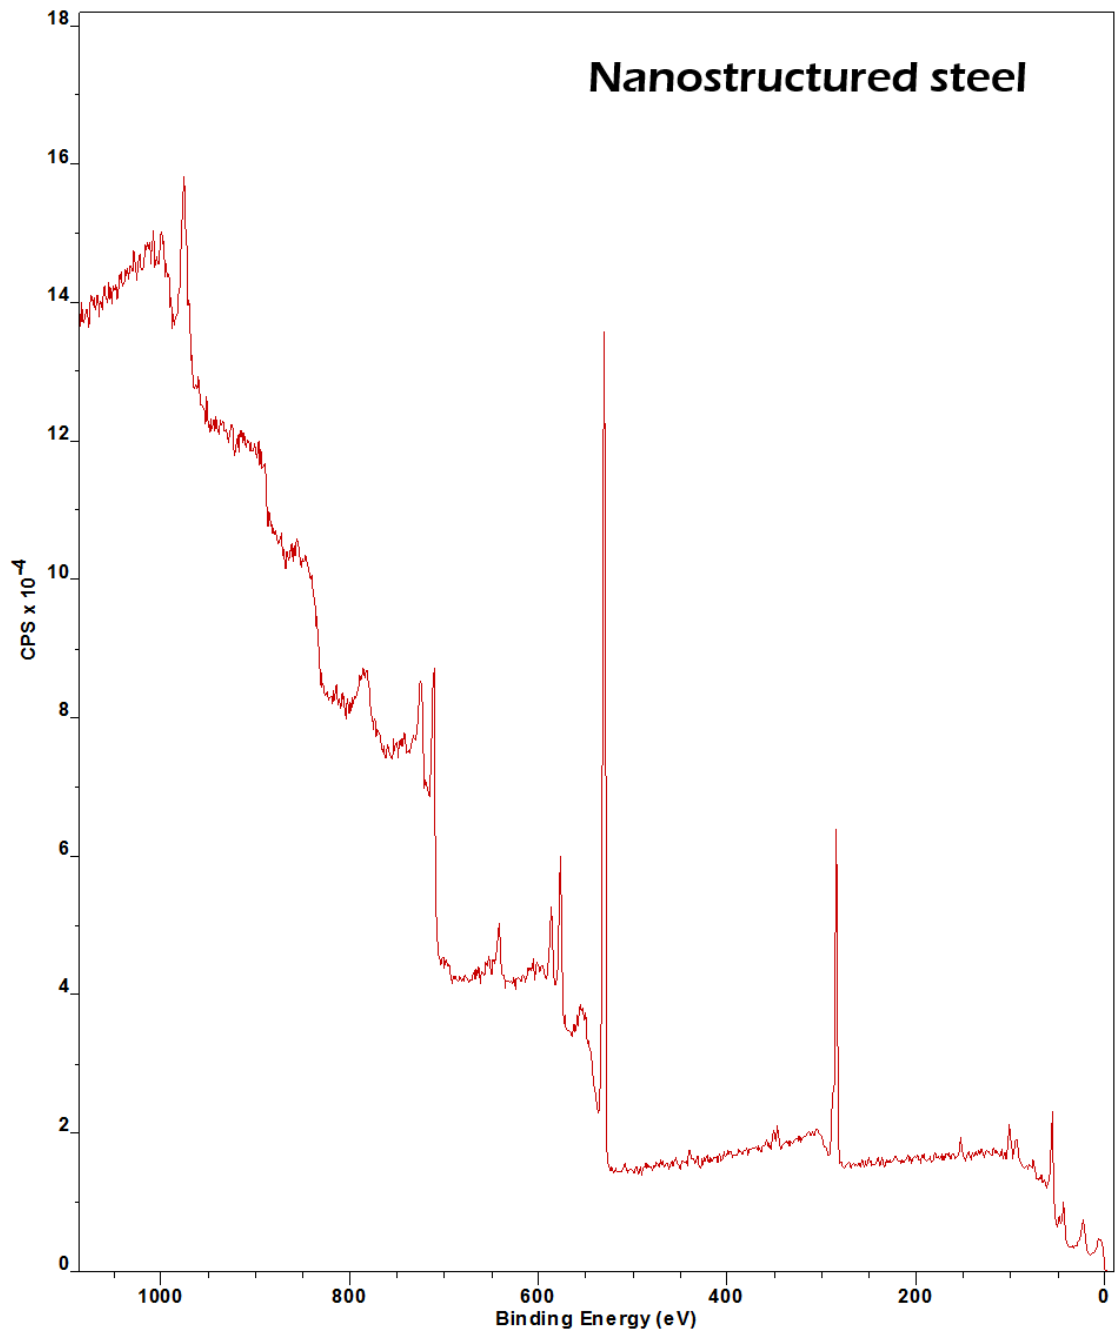

**Figure S3.** XPS Spectra corresponding to the nanostructured areas of the steel.
